# Supplementary material for: Unusual crystalline heterobimetallic trinuclear β-diketiminates [Yb{L(µ-Li(thf)}2] and [Yb{L′(µ-Li(thf)}2]·thf [L, L′ = {N(SiMe3)C(R)}2CH, R = Ph, C6H4Ph-4]Electonic supplementary information (ESI) available: NOE data for 1 and NMR data for 2. See http://www.rsc.org/suppdata/cc/b2/b203321f/
Source: Royal Society of Chemistry journal article supplement (doi:10.1039/b203321f), 2002-06-05
Supplement: b203321f.doc [file b203321f.doc]

Supplementary Material (ESI) for Chemical Communications

This journal is © The Royal Society of Chemistry 2002

NOE data of **1**

NMR data of **2**

**2** 1H NMR (293 K, 300.1 MHz, C6D6)  = 10.41 (d, J = 7.83 Hz, 4H, *o-H*A of 4-Dph), 10.32 (d, J = 7.88 Hz, 4H, *o-H*B of 4-Dph), 8.18 (d, J = 7.86 Hz, 4H, *o’-H*B of 4-Dph), 7.90 (t, J = 7.17 Hz, 2H, *p’-H*B of 4-Dph), 7.81 (d, J = 7.85 Hz, 4H, *o’-H*A of 4-Dph), 7.54 (t, J = 7.18 Hz, 2H, *p’-H*A of 4-Dph), 6.83 (t, J = 7.54 Hz, 4H, *m’-H*B of 4-Dph), 6.79 (t, J = 7.51, 4H, *m’-H*A of 4-Dph), 5.53 (d, J = 7.74 Hz, 4H, *m-H*A of 4-Dph), 5.15 (d, J = 7.98 Hz, 4H, *m-H*B of 4-Dph), 4.03 (br.s., 8H, OC*H2*CH2, thf), 1.45 (br.s., 8H, OCH2C*H2*, thf), 0.55 (s, 18H, Si(C*H*3)3A), 0.33 (s, 18H, Si(C*H*3)3B), -2.35 (s, 2H, C*H*). 13C{1H} (293 K, 75.5 MHz, C6D6)  = 219.03 (*ipso-C*B of 4-Dph), 214.55 (*C*H), 211.27 (*ipso-C*A of 4-Dph), 155.58 (*ipso’-C*B of 4-Dph), 151.57 (*ipso’-C*A of 4-Dph), 146.22 (*m-C*HB of 4-Dph), 142.91 (*m-C*HA of 4-Dph), 132.27 (*m’-C*HB of 4-Dph), 131.08 (*m’-C*HA of 4-Dph), 122.73 (*p’-C*HA of 4-Dph), 122.12 (*p’-C*HB of 4-Dph), 119.90 (*o’-C*HA of 4-Dph), 116.81 (*o’-C*HB of 4-Dph), 109.80 (*p-C*B of 4-Dph), 109.65 (*p-C*A of 4-Dph), 82.97 (*o-C*HA of 4-Dph), 80.18 (*o-C*HB of 4-Dph), 69.49 (br.s., O*C*H2CH2, thf), 25.52 (br.s., OCH2*C*H2, thf), -1.95 (s, Si(*C*H3)3A), -5.01 (s, Si(*C*H3)3B), N*C*(PhA)CH and N*C*(PhB)CH were not observed. 29Si{1H} NMR (293 K, 49.7 MHz, C6D6)  = 1.39 (s, *Si*Me3A), -20.85 (s, *Si*Me3A). 7Li{1H} (293 K, 116.6 MHz, C6D6)  = 11.26 (br.s, ½ = 37.68 Hz).

**Table 1** NOE experiment of **1**

| |  |  | Irradiation |  | | --- | --- | --- | --- | | , % | SiMe3A | SiMe3B | CH | | SiMe3A | * | - | - | | SiMe3B | - | * | - | | CH | 1.3 | - | * | | *m*-HB of Ph | 1.0 | 0.6 | - | | *m*-HA of Ph | 0.6 | - | - | | *p*-HA of Ph | - | - | - | | o-HB of Ph | 2.6 | 4.0 | 5.0 | | *o*-HA of Ph | 3.8 | 0.5 | 5.7 | | *p*-HB of Ph | - | - | - | |
| --- | --- | --- | --- | --- | --- | --- | --- | --- | --- | --- | --- | --- | --- | --- | --- | --- | --- | --- | --- | --- | --- | --- | --- | --- | --- | --- | --- | --- | --- | --- | --- | --- | --- | --- | --- | --- | --- | --- | --- | --- | --- | --- | --- | --- |

**Table 2** Heteronuclear NOE experiment of **1**

| |  | Irradiation | | | | | --- | --- | --- | --- | --- | |  | at 333 K | | at 298 K | | | , % | SiMe3A and SiMe3B | OC*H*2CH2, thf | SiMe3A | SiMe3B | | 6Li{1H} | 20.3 | - | 8.8 | 7.4 | |
| --- | --- | --- | --- | --- | --- | --- | --- | --- | --- | --- | --- | --- | --- | --- | --- | --- | --- | --- | --- | --- |
